# Supplementary material for: Specific colorimetric detection of Fe3+ ions in aqueous solution by squaraine-based chemosensor
Source: Royal Society of Chemistry journal article supplement (doi:10.1039/c8ra07345g), 2018-01-01
Supplement: c8ra07345g1.pdf [file c8ra07345g1.pdf]

## Supporting Information for

### **Specific colorimetric detection of Fe<sup>3+</sup> ions in aqueous solution by squaraine-based chemosensor**

Xiaoqian Liu,<sup>\*a</sup> Na Li,<sup>a</sup> Min-Min Xu,<sup>b</sup> Chunhui Jiang,<sup>c</sup> Jianhao Wang,<sup>a</sup> Guoqiang Song,<sup>\*a</sup>  
Yong Wang<sup>\*b</sup>

<sup>a</sup> School of Pharmaceutical Engineering and Life Science, Changzhou University,  
213164, Jiangsu, China

<sup>b</sup> College of Chemistry, Chemical Engineering and Materials Science, Soochow  
University, Suzhou 215123, PR China

<sup>c</sup> School of Environmental and Chemical Engineering, Jiangsu University of  
Science and Technology, 2 Mengxi Road, Zhenjiang, Jiangsu, China,  
212003

\*Corresponding authors Email address: chmliux@cczu.edu.sg (Xiaoqian Liu);  
sgq@cczu.edu.cn (Guoqiang Song); yowang@suda.edu.cn (Yong Wang)

## Table of Contents

|                                                                            |    |
|----------------------------------------------------------------------------|----|
| 1. General Information .....                                               | S3 |
| 2. NMR spectrum of compound <b>TSQ</b> .....                               | S4 |
| 3. Comparison of <b>TSQ</b> with recently reported chemosnesors.....       | S4 |
| 4. Mass spectrum of <b>TSQ</b> and <b>TSQ-Fe<sup>3+</sup></b> complex..... | S5 |
| 5. Reversibility study of <b>TSQ-Fe<sup>3+</sup></b> with EDTA .....       | S6 |

## **1. General Information**

### **Reagents and apparatus**

Unless stated, all the reagents used were of analytical grade from commercial sources without further purification.  $^1\text{H}$  NMR (400 MHz) and  $^{13}\text{C}$  NMR (400 MHz) spectra were recorded on a Bruker AV-400 spectrometer (TMS as internal standard). Mass spectrometry analysis was performed on a Q exactive mass spectrometer (Thermo Fisher Scientific, USA). Absorption spectra were measured on M5 spectrometer.

### **Nuclear Magnetic Resonance Spectroscopy**

Proton nuclear magnetic resonance ( $^1\text{H}$  NMR) and carbon nuclear magnetic resonance ( $^{13}\text{C}$  NMR) spectroscopy were performed on 400 MHz NMR spectrometers. Chemical shifts are reported as  $\delta$  in units of parts per million (ppm) downfield from tetramethylsilane ( $\delta 0.00$ ), using the residual solvent signal as an internal standard: chloroform- $d$ ,  $\text{CDCl}_3$ , ( $^1\text{H}$  NMR,  $\delta$  7.26, singlet;  $^{13}\text{C}$  NMR,  $\delta$  77.04, triplet). Multiplicities are given as: s (singlet), d (doublet), t (triplet), q (quartet), m (multiplets). The number of protons (n) for a given resonance is indicated by numbers of H.

### **UV-vis titration measurements**

10 mM stock solution of **TSQ** was prepared by dissolving the required amount in DMSO. Further dilutions were made to prepare 100  $\mu\text{M}$  of **TSQ** by adding mixed solution. The different concentrations of metal ions were consequently added in to make total volume of 200  $\mu\text{L}$ . Absorption measurements were made in 96 well plates.

## 2. NMR Spectra for TSQ

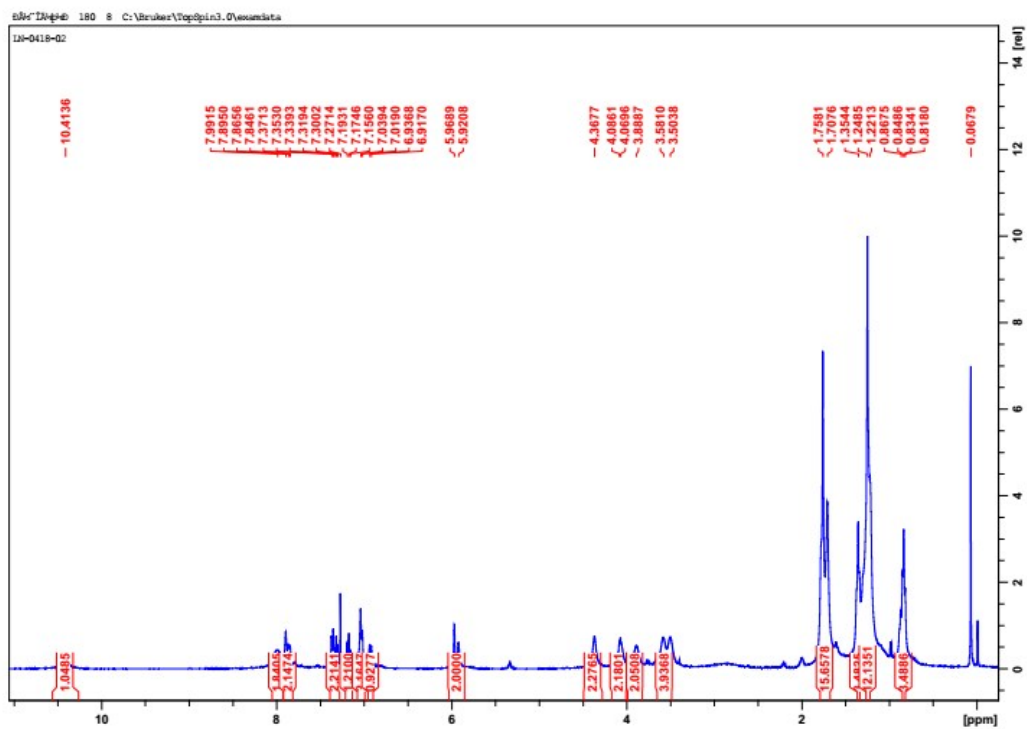

Figure S1. <sup>1</sup>H NMR spectrum for compound TSQ

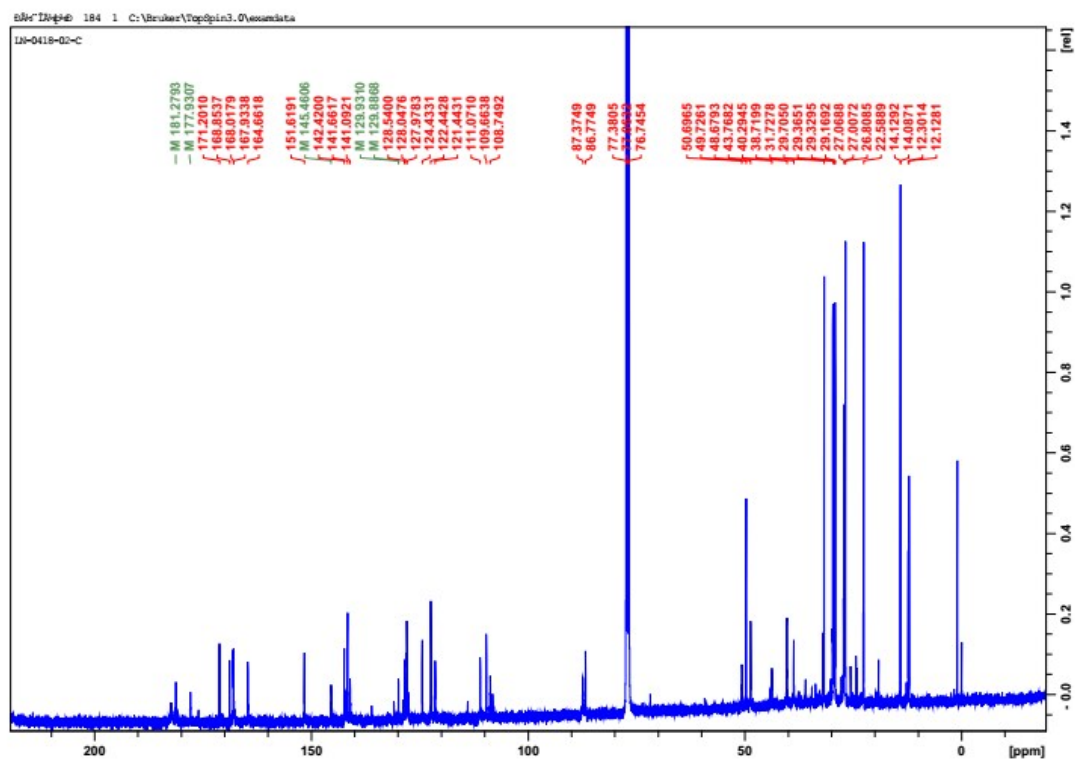

Figure S2. <sup>13</sup>C NMR spectrum for compound TSQ

### 3. Comparison of TSQ with recently reported chemosensors

Table S1 Comparison of TSQ with recently reported chemosensors

| Sensor                    | Target           | Response type | LOD ( $\mu\text{M}$ ) | Reaction media                    | Reversibility | Reference |
|---------------------------|------------------|---------------|-----------------------|-----------------------------------|---------------|-----------|
| Sugar-functioned coumarin | $\text{Fe}^{3+}$ | Color         | 4.6                   | $\text{H}_2\text{O}$              | No            | 58        |
| Julolidine derivative     | $\text{Fe}^{3+}$ | Color         | 6.8                   | DMF                               | No            | 59        |
| Hetarylazo                | $\text{Fe}^{3+}$ | Color         | 2.0                   | $\text{CH}_3\text{CN}$            | No            | 41        |
| Our work                  | $\text{Fe}^{3+}$ | Color         | 1.0                   | 20% AcOH-<br>$\text{H}_2\text{O}$ | Yes           | /         |

### 4. Mass spectrum of TSQ and TSQ- $\text{Fe}^{3+}$ complex

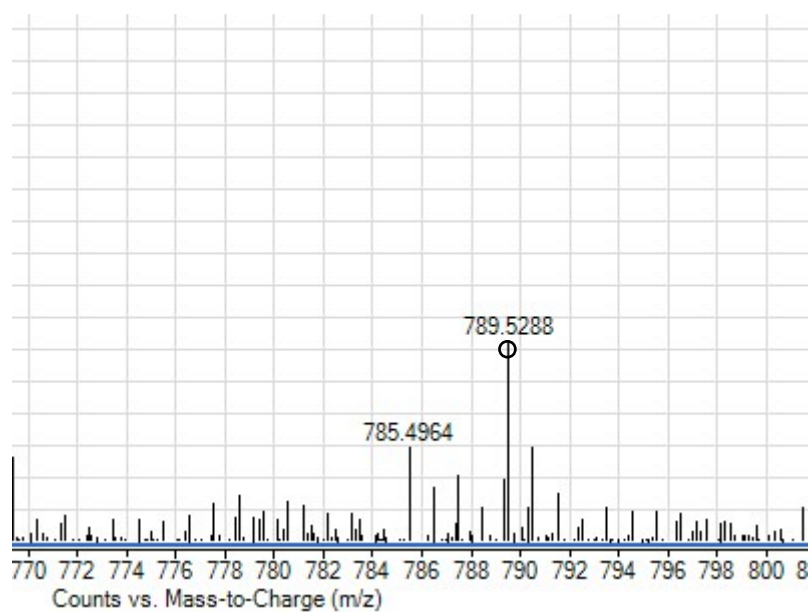

**Figure S3a.** High resolution mass spectrum for **TSQ**

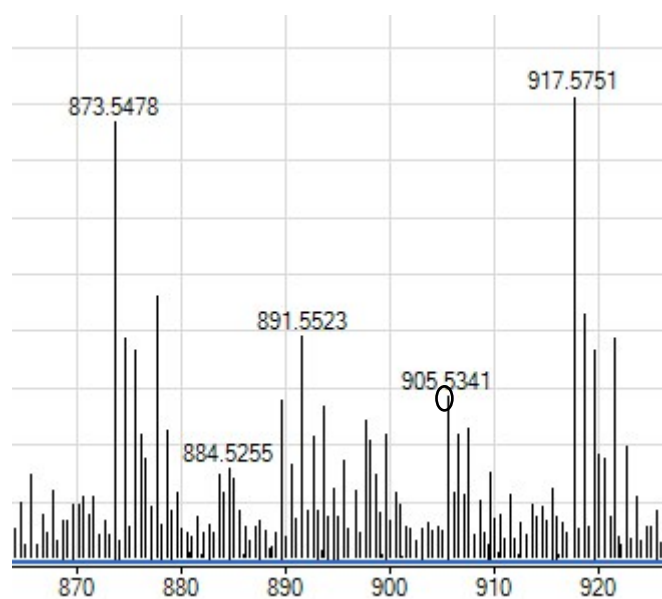

**Figure S3b.** High resolution mass spectrum for [TSQ+Fe<sup>3+</sup>+CH<sub>3</sub>COOH+H<sup>+</sup>]

### 5. Reversibility study of TSQ-Fe<sup>3+</sup> with EDTA

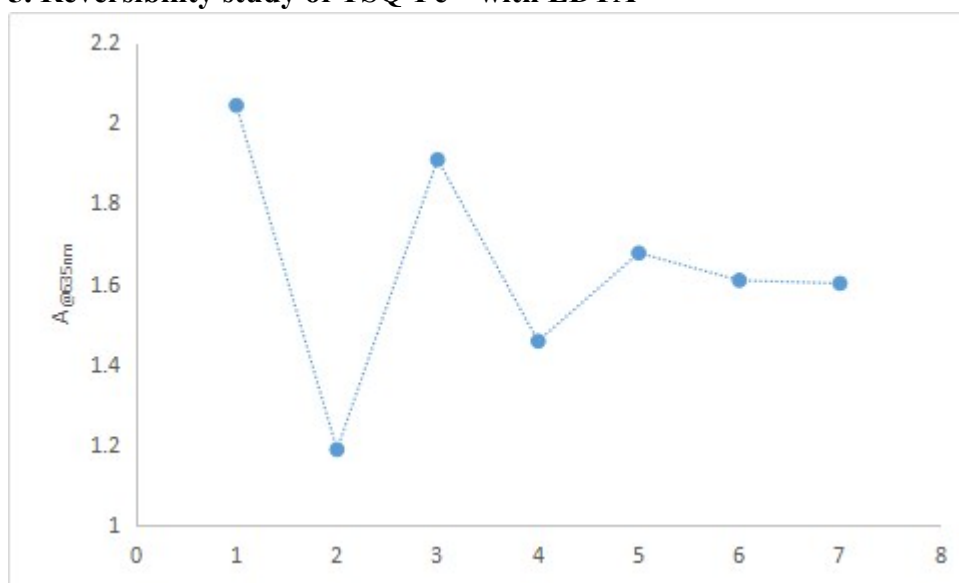

**Figure S4.** Stepwise complexation/decomplexation cycles were carried out in 20% AcOH-H<sub>2</sub>O solution with TSQ and Fe<sup>3+</sup>
